# Supplementary material for: Revealing the beneficial effects of a dairy infant formula on the gut microbiota of early childhood children with autistic spectrum disorder using static and SHIME® fermentation models
Source: Royal Society of Chemistry journal article supplement (doi:10.1039/d3fo01156a), 2023-01-01
Supplement: d3fo01156a2.pdf [file d3fo01156a2.pdf]

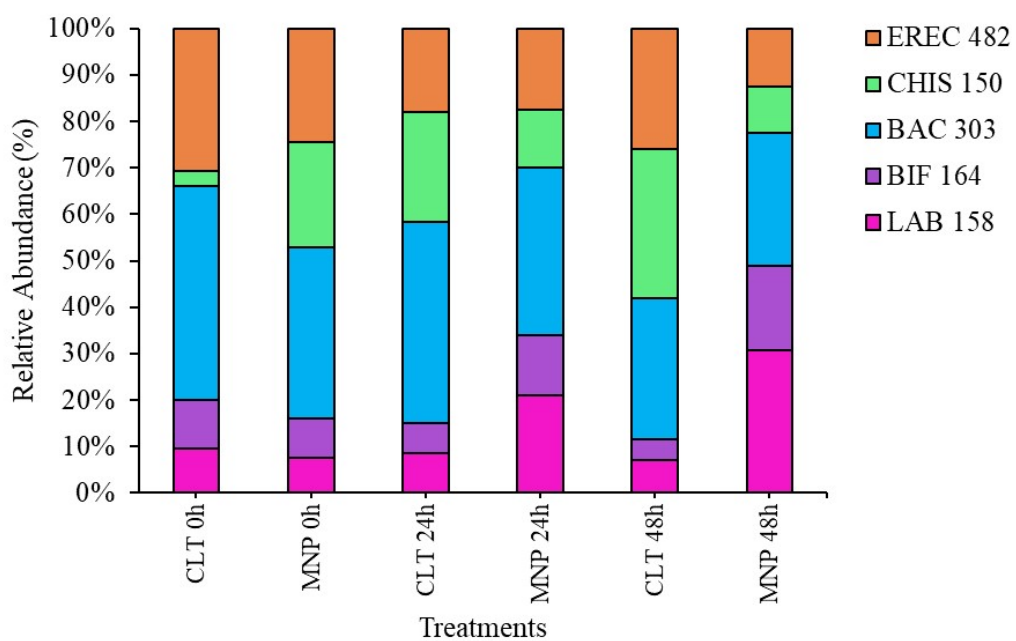

**Figure S1:** Relative abundances of the selected bacterial groups measured during the static colonic fermentation with MNP
