# Supplementary material for: Revealing the beneficial effects of a dairy infant formula on the gut microbiota of early childhood children with autistic spectrum disorder using static and SHIME® fermentation models
Source: Royal Society of Chemistry journal article supplement (doi:10.1039/d3fo01156a), 2023-01-01
Supplement: d3fo01156a3.pdf [file d3fo01156a3.pdf]

**Figure S2:** Correlation between short chain fat acids production, ammonium ions, and bacterial genera. Positive correlations are represented by blue color and negative correlations by red color. Color intensities are proportional to the correlation coefficients (Spearman correlation). Significant correlations are indicated by ( $p < 0.05$ ).
