# Supplementary material for: Revealing the beneficial effects of a dairy infant formula on the gut microbiota of early childhood children with autistic spectrum disorder using static and SHIME® fermentation models
Source: Royal Society of Chemistry journal article supplement (doi:10.1039/d3fo01156a), 2023-01-01
Supplement: d3fo01156a4.pdf [file d3fo01156a4.pdf]

**Supplementary Table 1.** Prebiotic index calculated for control and MNP considering the relative abundance of different bacterial groups analyzed by fluorescence *in situ* hybridization (FISH) combined with multiparametric flow cytometry in an *in vitro* static fermentation.

| Samples | Prebiotic score              |                              |
|---------|------------------------------|------------------------------|
|         | 24 h                         | 48 h                         |
| CTL     | $-1.98 \pm 0.04^{\text{Ba}}$ | $-9.12 \pm 0.02^{\text{Aa}}$ |
| MNP     | $35.54 \pm 0.05^{\text{Ab}}$ | $65.18 \pm 0.07^{\text{Bb}}$ |

(CTL): Control, (MNP): Milnutri Profutura®.

A–B: Different superscript capital letters in the same row for the same cultivation media denotes differences ( $p < 0.05$ ), based on Student's t-test. a-b: different superscript small letters in the same column at the same time interval denotes difference ( $p < 0.05$ ) among cultivation media, based on Tukey's test.
